# Supplementary material
Source: HighWire-hosted journal article supplement (https://thorax.bmj.com/highwire/filestream/174413/field_highwire_adjunct_files/4/649770_Supplementary_figure_legends.docx)
Supplement: 649770_Supplementary_figure_legends.docx [file 649770_Supplementary_figure_legends.docx]

**Supplementary figure 1**

Quantitation of the relative band density per treatment ± s.e.m. (*p<0.05, n=5). (i) E-cadherin, (ii) fibronectin, (iii) vimentin. All results normalised to β-tubulin.

**Supplementary figure 2**

Quantitation of the relative band density per treatment ± s.e.m. (*p=0.0036, n=5). (i) Collagen I (ii) Fibronectin.

**Supplementary figure 3**

Quantitation of the relative band density of pro-MMP-9 per treatment ± s.e.m. (*p=0.0001, n=5).
